# Supplementary material
Source: PubMed Central journal article supplement (PMC7611553)

# Unprocessed blots from Ext. Data Fig. 8

Unprocessed blots from Ext. Data Fig. 8e  
Vinculin, MFN1, MFN2 and mt-CO1

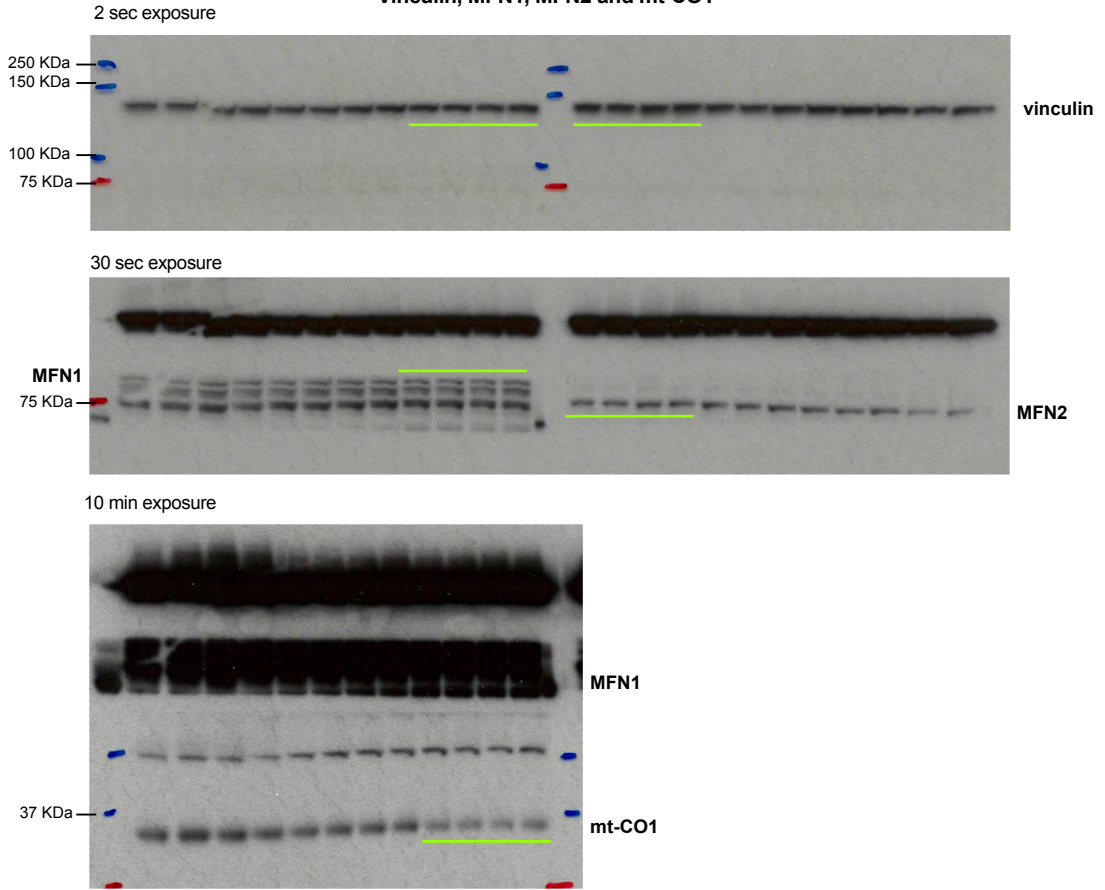

Unprocessed blots from Ext. Data Fig. 8e  
Vinculin, DRP1, ATPB and TOMM20

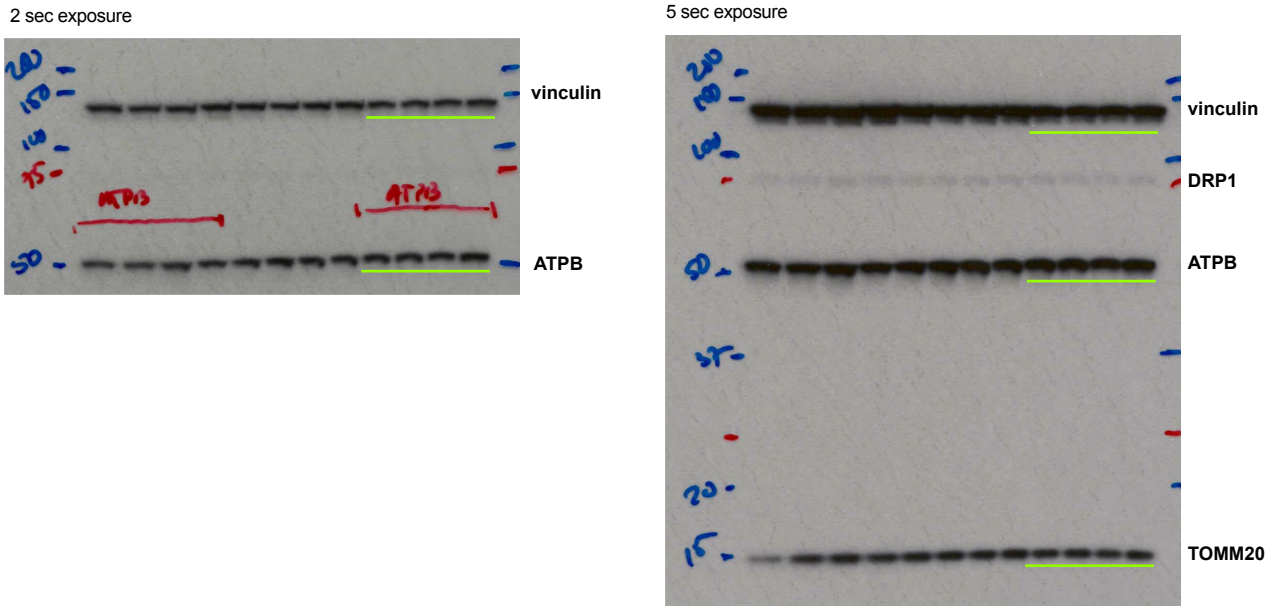

Supplement: EMS127075-supplement-Source_Data_Extended_Data_Figure_8.pdf [file EMS127075-supplement-Source_Data_Extended_Data_Figure_8.pdf]
