# Supplementary material
Source: PubMed Central journal article supplement (PMC7611553)

# Unprocessed blots from Ext. Data Fig. 6

Unprocessed blots from Ext. Data Fig. 6a  
OPA1 and  $\alpha$ -tubulin

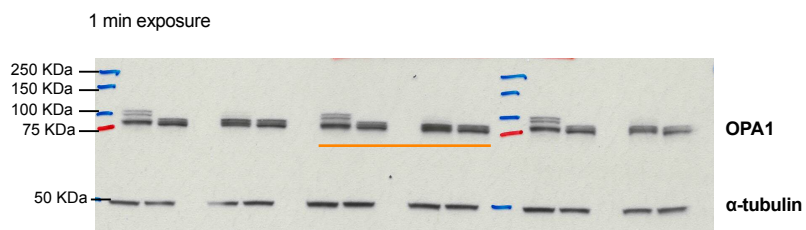

Supplement: EMS127075-supplement-Source_Data_Extended_Data_Figure_6.pdf [file EMS127075-supplement-Source_Data_Extended_Data_Figure_6.pdf]

# Unprocessed blots from Fig. 4

## Unprocessed blots from Fig. 4i

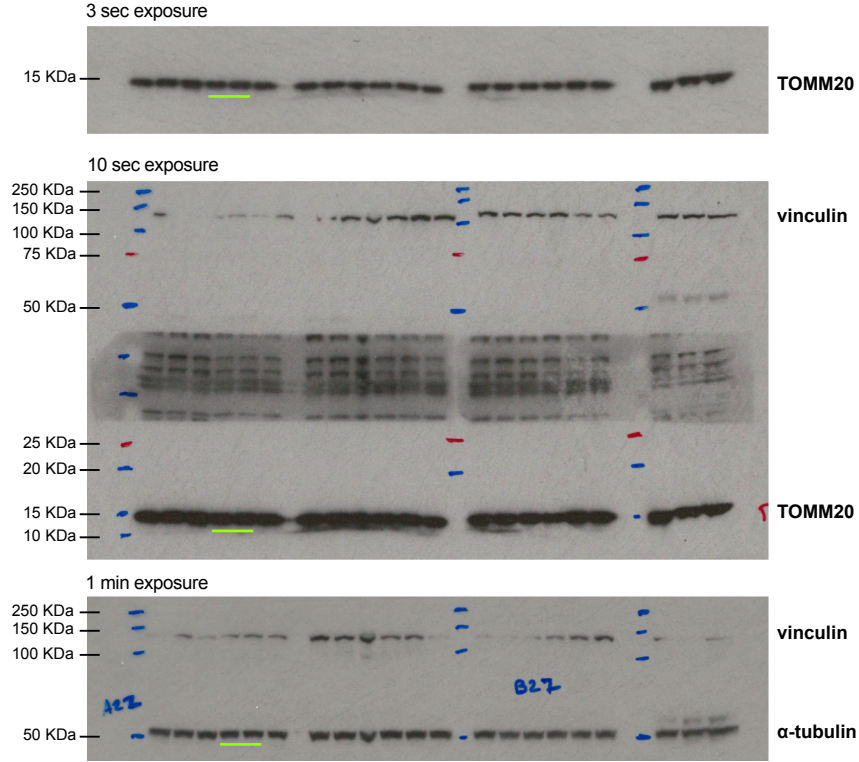

## Unprocessed blots from Fig. 4j

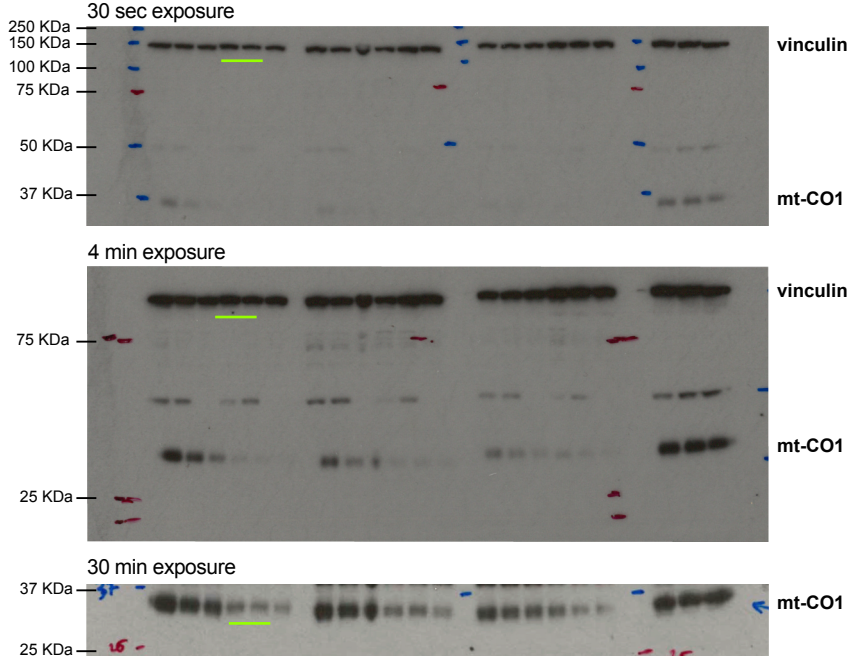

Supplement: EMS127075-supplement-Source_Data_Figure_4.pdf [file EMS127075-supplement-Source_Data_Figure_4.pdf]
